# Supplementary material
Source: Springer Nature journal article supplement (https://www.springermedizin.de/resource/supplementary/12936_2014_3648_MOESM1_ESM.pdf/9546060)
Supplement: MOESM1 [file 9546060]

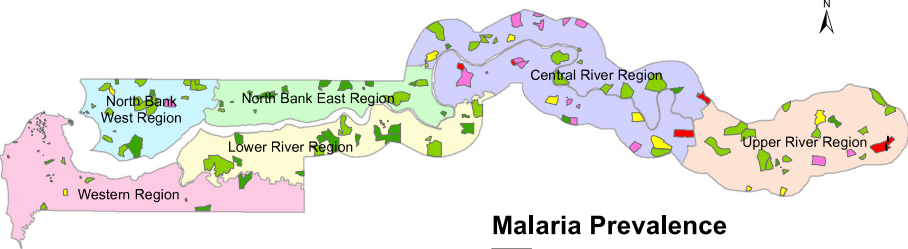

75  
Kilometers

### Malaria Prevalence

- 0% : No Malaria
- >0% and <5% : Low Malaria
- $\geq 5\%$  and  $< 10\%$  : Moderate, Low
- $\geq 10\%$  and  $< 20\%$  : Moderate, High
- $\geq 20\%$  : High Malaria
